# Supplementary material for: Hepatocyte nuclear factor 1 alpha influences pancreatic cancer growth and metastasis
Source: PubMed Central journal article supplement (PMC7678871; doi:10.1038/s41598-020-77287-5), 2020-11-19

## **Hepatocyte nuclear factor 1 alpha influences pancreatic cancer growth and metastasis**

Ramadevi Subramani<sup>1,2\*</sup>, Ph.D., Joshua Medel<sup>2,3</sup>, MS., Kristina Flores<sup>2</sup>, BFA., Courtney Perry<sup>2</sup>, BS., Adriana Galvez<sup>1</sup>, MS., Mayra Sandoval<sup>2</sup>, BS., Servando Rivera<sup>2</sup>, MS., Diego A. Pedroza<sup>2</sup>, MS., Elizabeth Penner<sup>2,4</sup>, MS., Mahika Chitti<sup>2</sup> and Rajkumar Lakshmanaswamy<sup>1,2\*</sup> Ph.D.

<sup>1</sup> Center of Emphasis in Cancer Research, Department of Molecular and Translational Medicine, Texas Tech University Health Sciences Center El Paso, Paul L. Foster School of Medicine, El Paso, Texas-79905.

<sup>2</sup> Graduate School of Biomedical Sciences, Texas Tech University Health Sciences Center, El Paso, Texas-79905.

<sup>3</sup> Division of Cancer Control and Population Sciences, National Cancer Institute, Bethesda, MD 20892

<sup>4</sup> Department of Pathology and Laboratory Medicine, McGovern Medical School, UT Health Science Center at Houston, Houston, TX 77030

### **\*Corresponding Authors**

#### **Rajkumar Lakshmanaswamy, PhD**

Tel: +1-915-215-4227, Fax: +1-915-783-5222. E-mail: [rajkumar.lakshmanaswamy@ttuhsc.edu](mailto:rajkumar.lakshmanaswamy@ttuhsc.edu)

#### **Ramadevi Subramani, PhD**

Tel: +1-915-215-6851, Fax: +1-915-783-5222. E-mail: [ramadevi.subramani@tuhs.edu](mailto:ramadevi.subramani@tuhs.edu)

## Supplementary materials and methods:

### Antibodies and Reagents

The primary antibodies obtained and used for the experiments in this study were: *HNF1 $\alpha$*  (12425), Notch 2 (4530), Snail (3879), Zeb (3396), Vimentin (5741), Slug (9585), N-Cadherin (4016), E-Cadherin (3195), pPI3K (4228), PI3K (4292), pmTOR (2974), mTOR (4517), pp70S6 kinase (9206), p70S6 kinase (9202), and Bim (2933), Bak (3814), Bax (2772), Cleaved Caspase 3 (9661), P53, pP53 (Cell Signaling Technology, Boston, MA, USA); Cleaved PARP (sc-8007), pAKT (sc-101629), AKT (sc-5298), pERK (sc-101760), and ERK (sc-94) (Santa Cruz, CA, USA); Caspase 8 (ab61755) and Bcl-2 (ab73985) (Abcam, Cambridge, MA, USA);  $\beta$ -actin (Sigma Aldrich, St. Louis, MO, USA). Respective anti-mouse and anti-rabbit secondary antibodies were acquired from Santa Cruz Biotechnology (Santa Cruz, CA, USA). The Transwell (6.5 mm) with 8.0  $\mu$ m pore polycarbonate membrane inserts were purchased from Corning Incorporated (Corning, NY, USA). Both BD Matrigel (Bedford, MA, USA) and BD Pharmingen Annexin V-FITC Apoptosis Detection Kit I were obtained from BD Biosciences (San Diego, CA, USA). MTS reagent [3-(4, 5-dimethylthiazol-2-yl)-5-(3-carboxymethoxyphenyl)-2-(4-sulfophenyl)-2H-tetrazolium] was purchased from Promega (Madison, WI, USA). Mammalian protein extraction reagent (mPER) was acquired from Thermo Scientific (Rockford, IL, USA).

### Sequences for *HNF1 $\alpha$* siRNA subtypes “A”, “B”, and “C”

SR304741A-rGrGrArGrUrGrCrArArUrArGrGrGrCrGrGrArArUrGrCrATC

SR304741B-rGrGrArCrArGrGrArCrUrArArCrArCrUrCrArGrArArGrCCT

SR304741C-rCrGrGrUrGrUrGrCrGrCrUrArUrGrGrArCrArGrCrCrUrGCG

Supplementary Figure S1

A

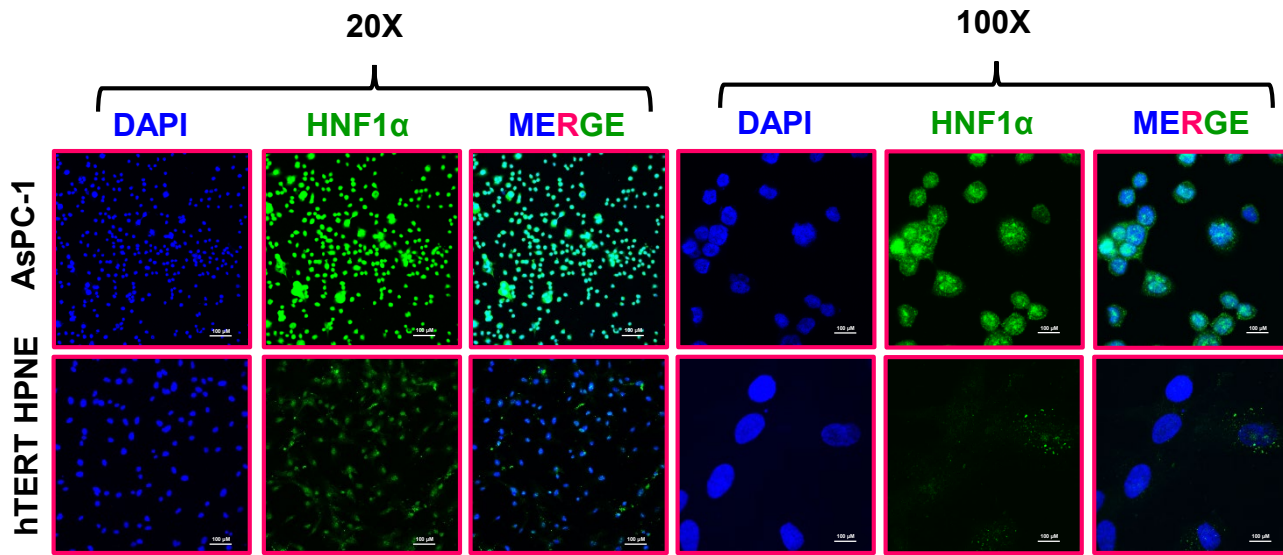

B

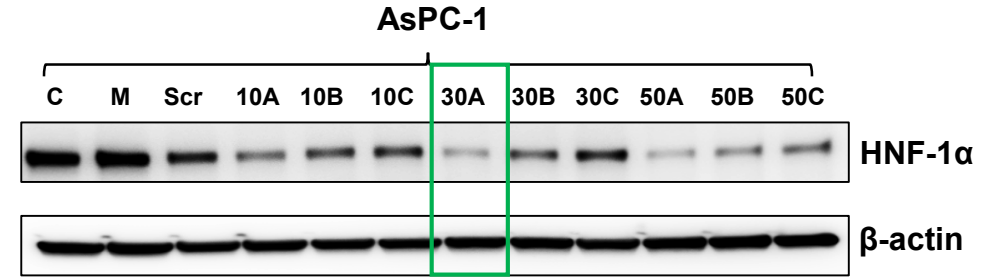

# Supplementary Figure S2

**A**

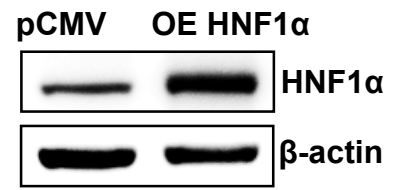

**B**

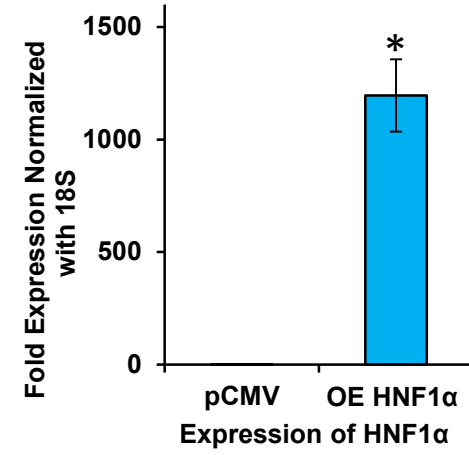

# Supplementary Figure S3

**A**

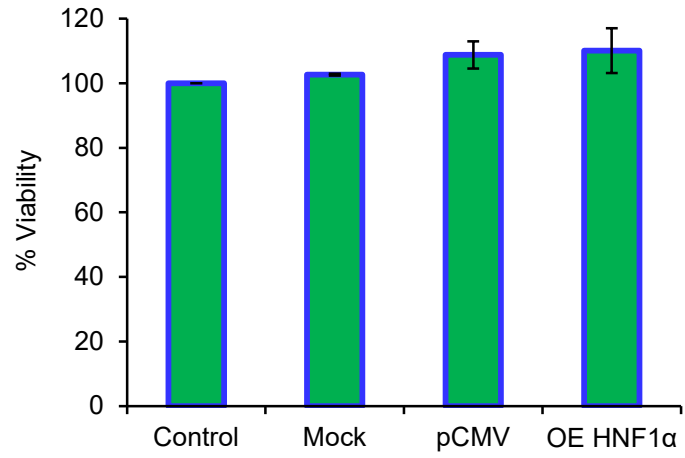

**B**

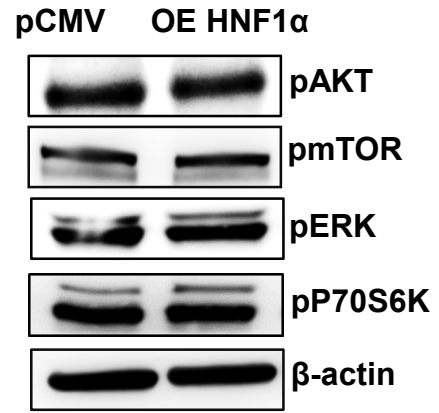

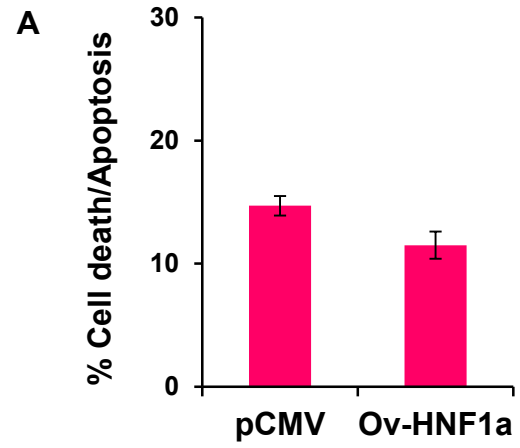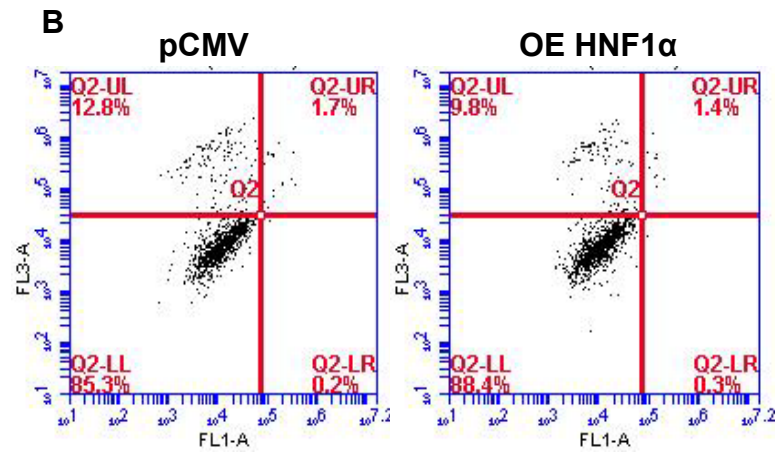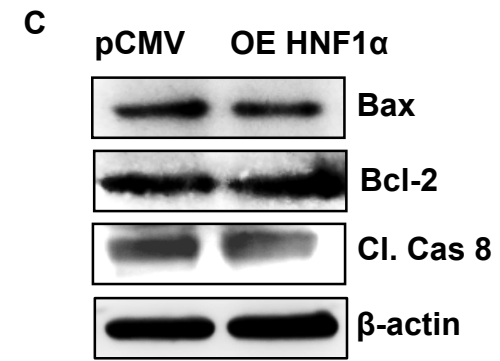

Supplementary Figure S5

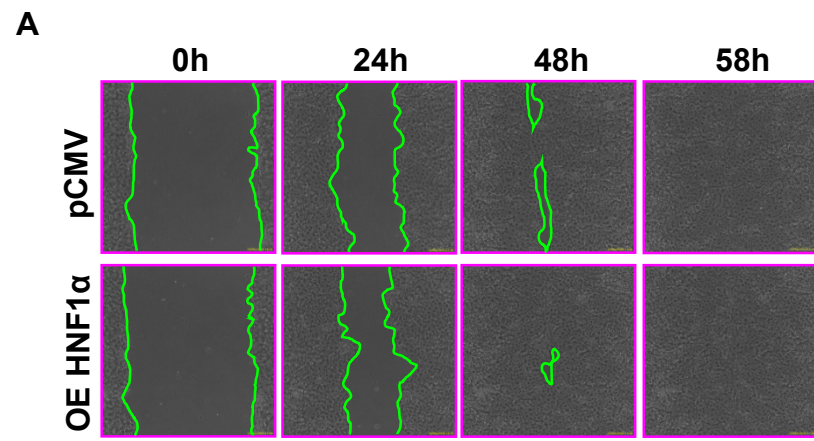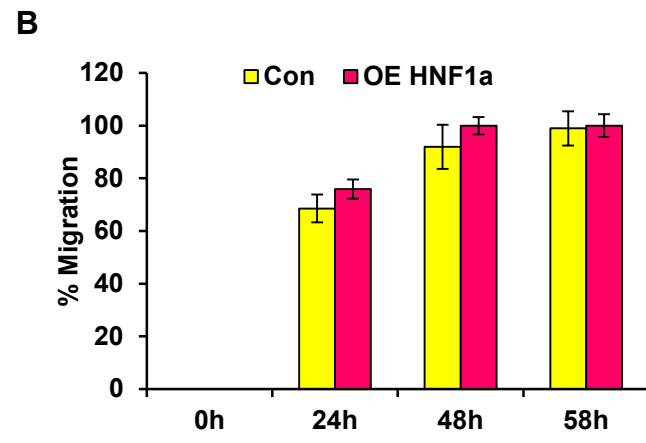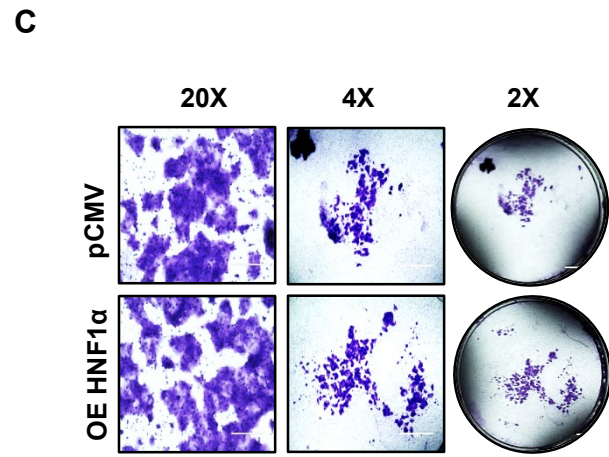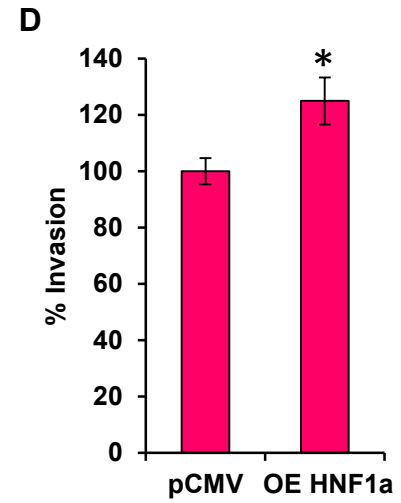

# Supplementary Figure S6

**A**

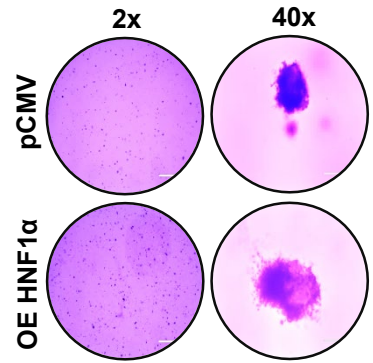

**B**

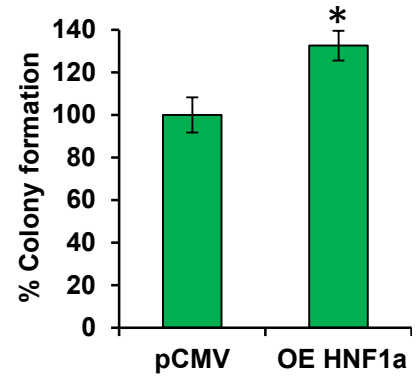

**C**

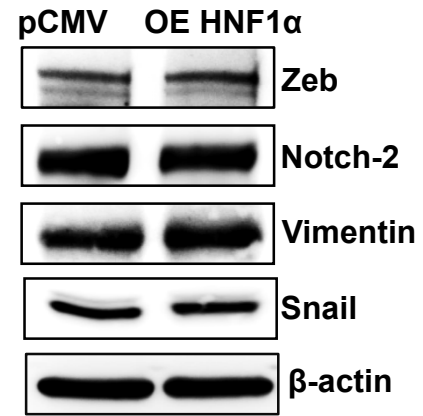



1 **Supplementary Figure Legends:**

2 **Supplementary Fig. S1**

3 **A.** Immunofluorescence of HNF1 $\alpha$  expression in AsPC-1 and hTERT HPNE cells (20X and 100X  
4 magnification). **B.** AsPC1 cells were transfected with three different predesigned HNF1 $\alpha$  siRNAs  
5 at different concentrations.

6 **Supplementary Fig. S2**

7 **A.** Western blot analysis of HNF1 $\alpha$  protein expression in overexpressed HNF1 $\alpha$  HPAC pancreatic  
8 cancer cells. **B.** Relative mRNA expression level of HNF1 $\alpha$  in overexpressing HNF1 $\alpha$  HPAC cells.  
9 Data shown as mean +/- SEM. Experiments (n=3) were repeated three times in triplicates.  
10 \*p<0.05.

11 **Supplementary Fig. S3**

12 **A.** MTS assay was used to measure cell viability in response to HNF1 $\alpha$  overexpression in HPAC  
13 cells. **D.** Expression levels of pAKT, pmTOR, pERK, mTOR, pP70S6K, and  $\beta$ -actin were  
14 determined by Western Blot in overexpressed HNF1 $\alpha$  HPAC cells. Data shown as mean +/- SEM.  
15 Experiments (n=3) were repeated three times in triplicates.

16 **Supplementary Fig. S4**

17 **A & B.** Apoptosis analysis of overexpressed HNF1 $\alpha$  HPAC cells measured by flow cytometry.  
18 **C.** Western blot analysis of apoptotic markers in siHNF1 $\alpha$  AsPC-1 cells and overexpressed HPAC  
19 cells. Data shown as mean +/- SEM. Experiments (n=3) were repeated three times in triplicates.

20

21

22 **Supplementary Fig. S5**

23 **A & B.** Wound-healing assay was performed in HNF1 $\alpha$  overexpressed HPAC cells; migration was  
24 analyzed using Nikon Biostation Ct at 2h intervals for up to 96h at 4X magnification. **C & D.**  
25 Invasiveness of OVHNF1 $\alpha$  HPAC cells were observed using a Matrigel invasion assay, captured  
26 using Nikon Eclipse TS 100 microscope. Data shown as mean +/- SEM. Experiments (n=3) were  
27 repeated three times in triplicates. \*p<0.05.

28 **Supplementary Fig. S6**

29 **A & B.** Colony formation assay was performed in HNF1 $\alpha$  overexpressed HPAC cells. **C.** EMT  
30 markers analyzed by Western blot in overexpression HNF1 $\alpha$  in HPAC cells. Data shown as mean  
31 +/- SEM. Experiments (n=3) were repeated three times in triplicates. \*p<0.05

**Fig. 2A**

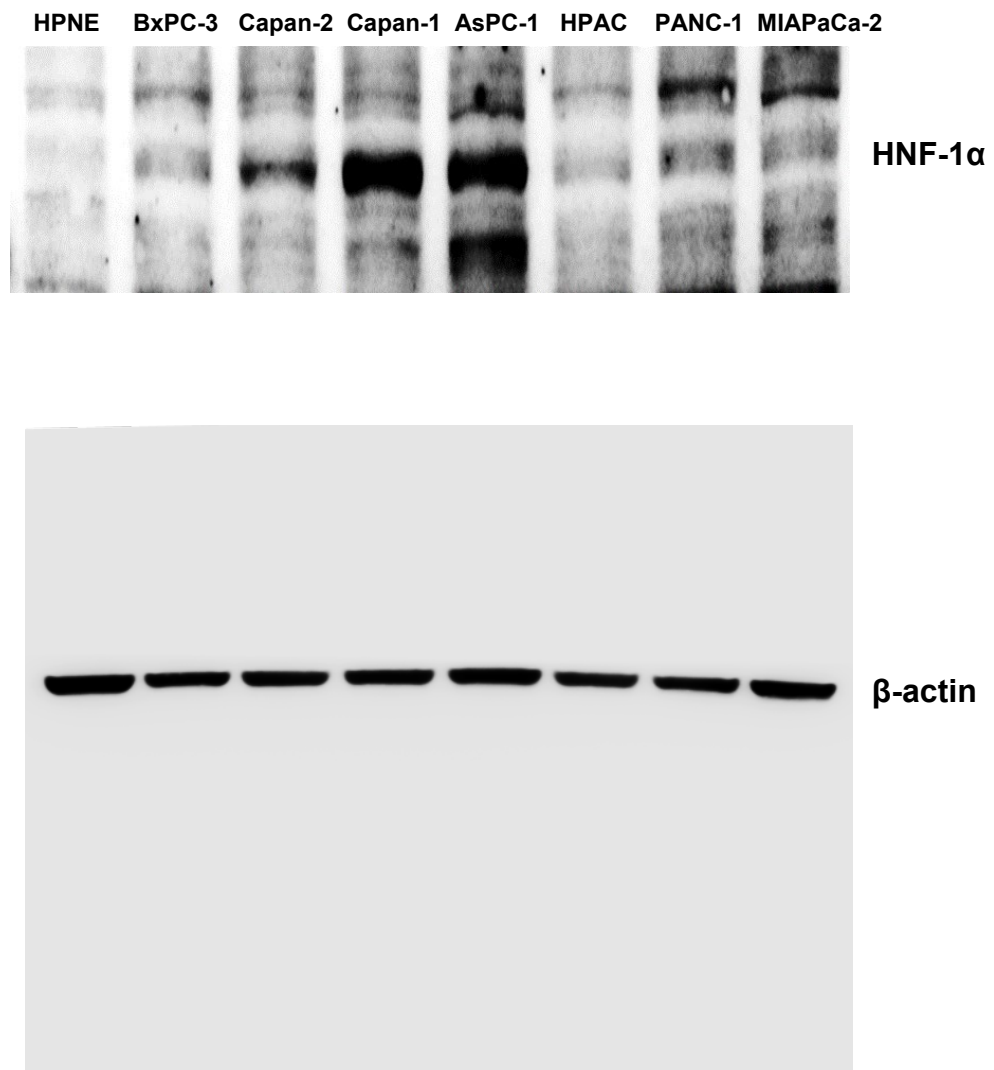

**Fig. 2C**

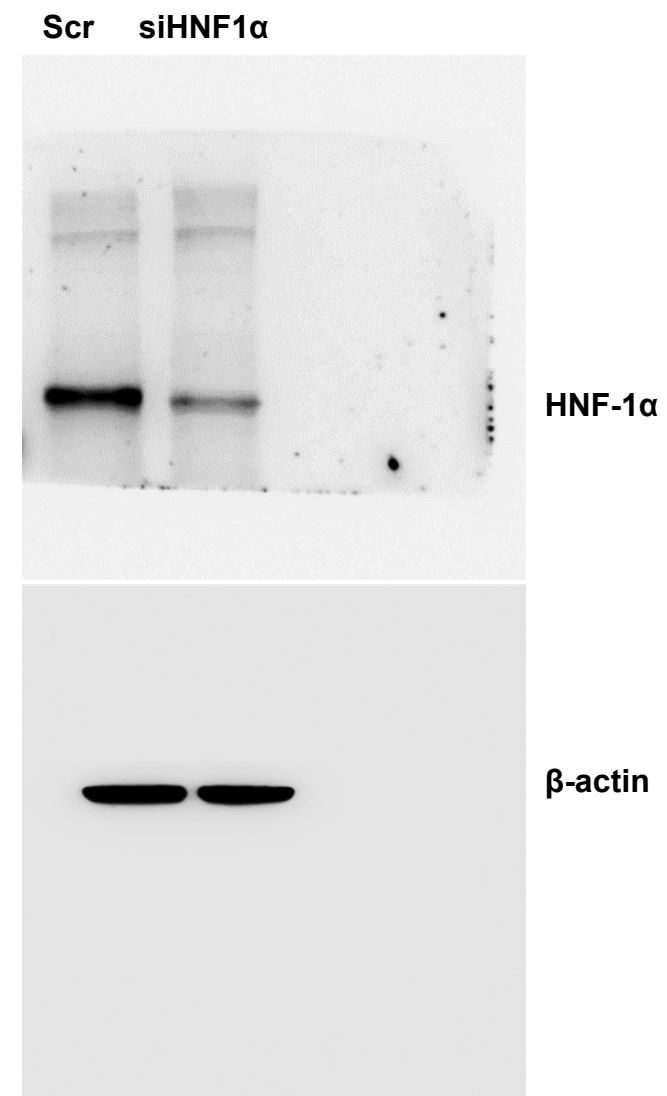

**Fig. 3A**

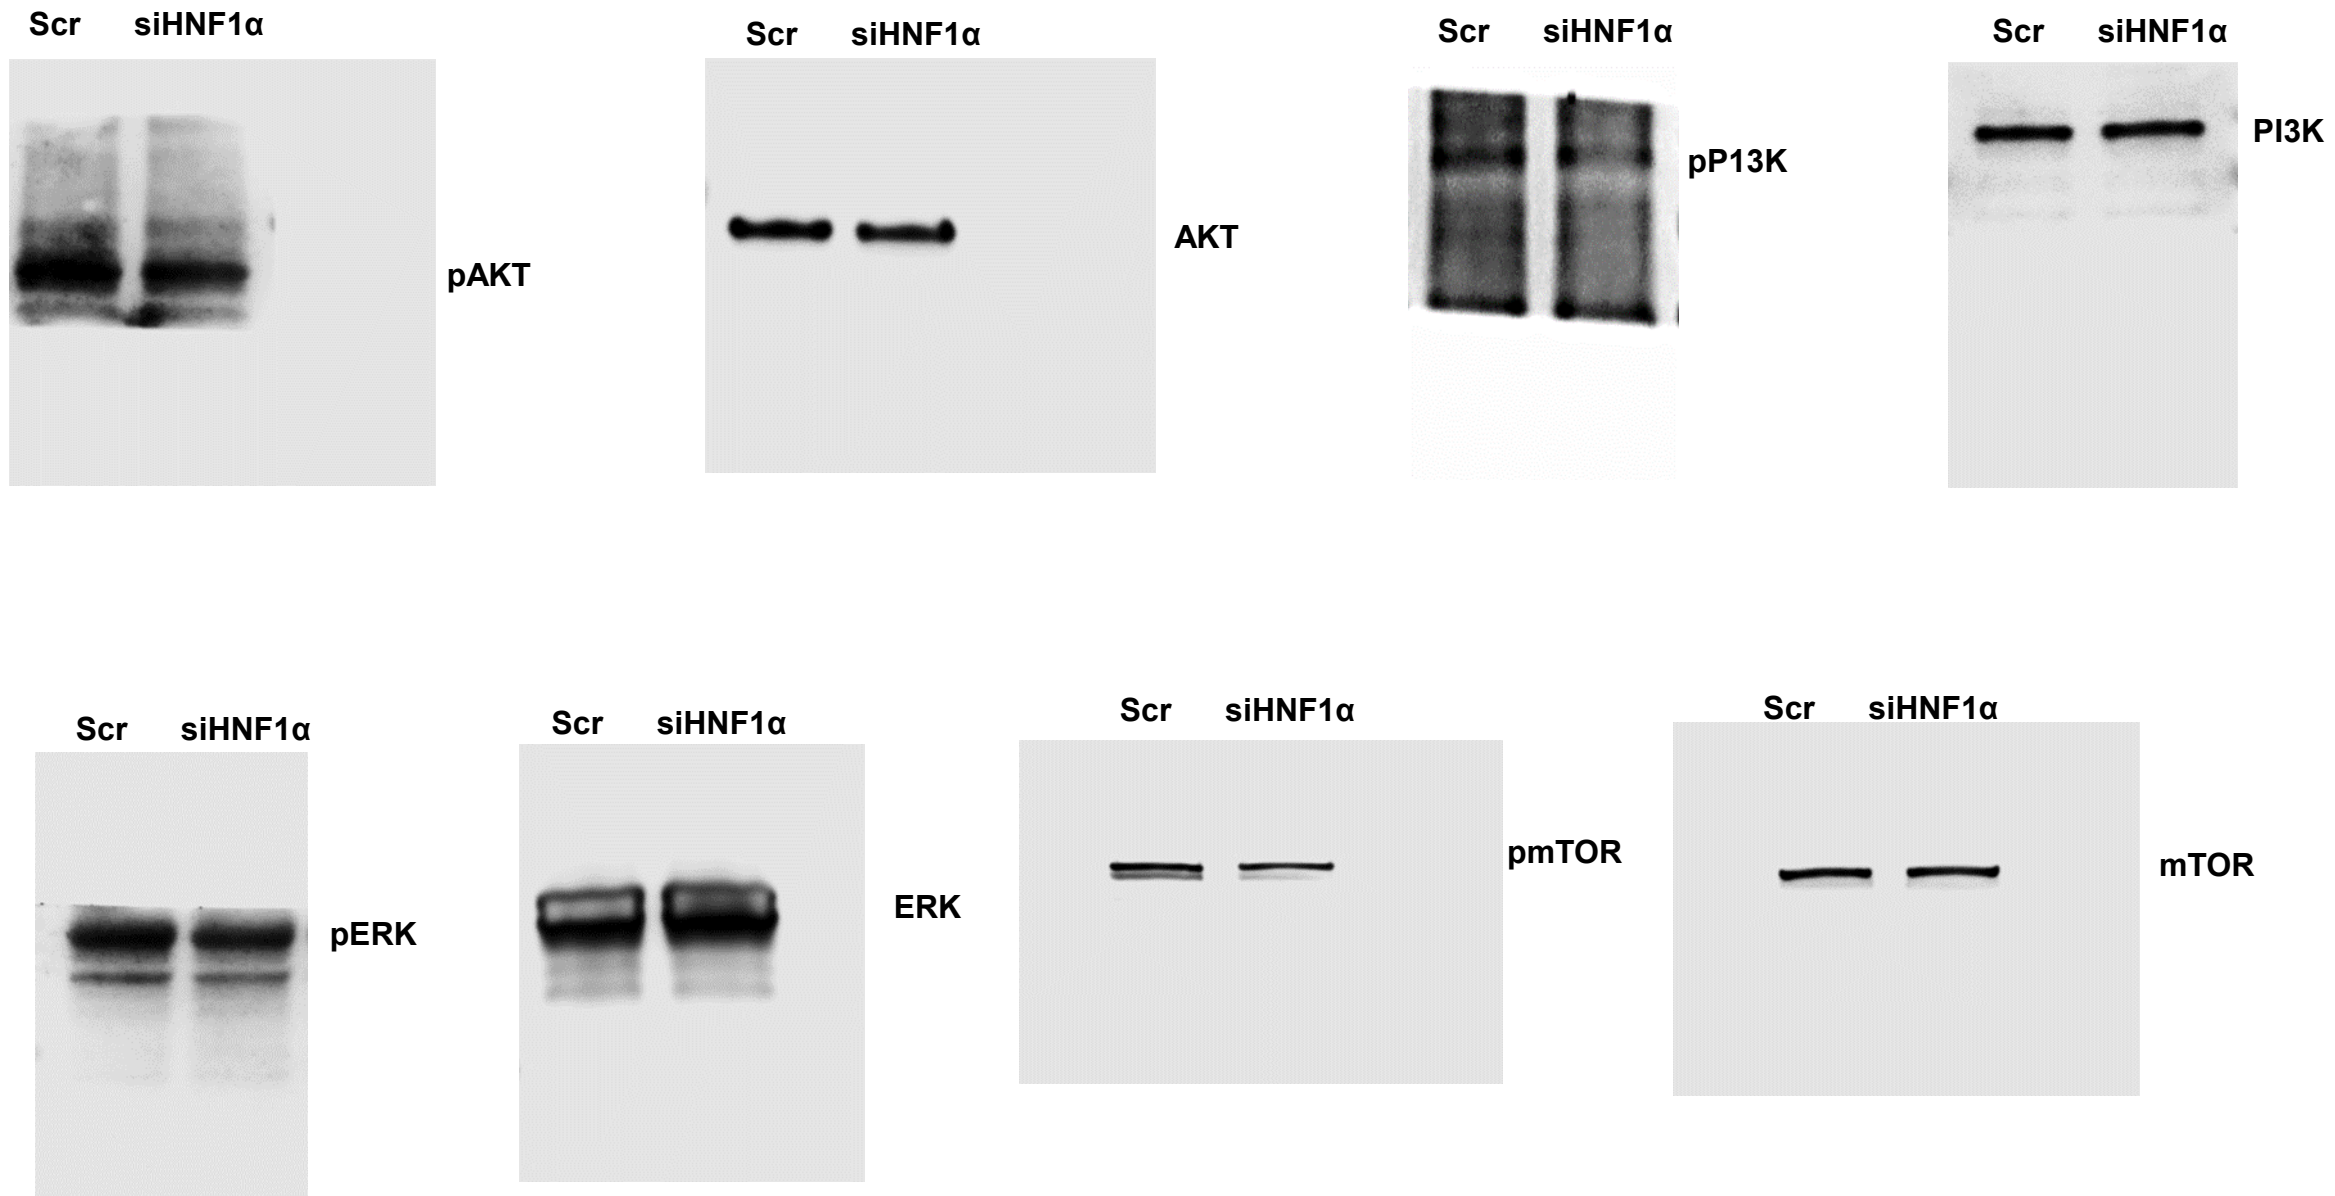

Fig. 3E

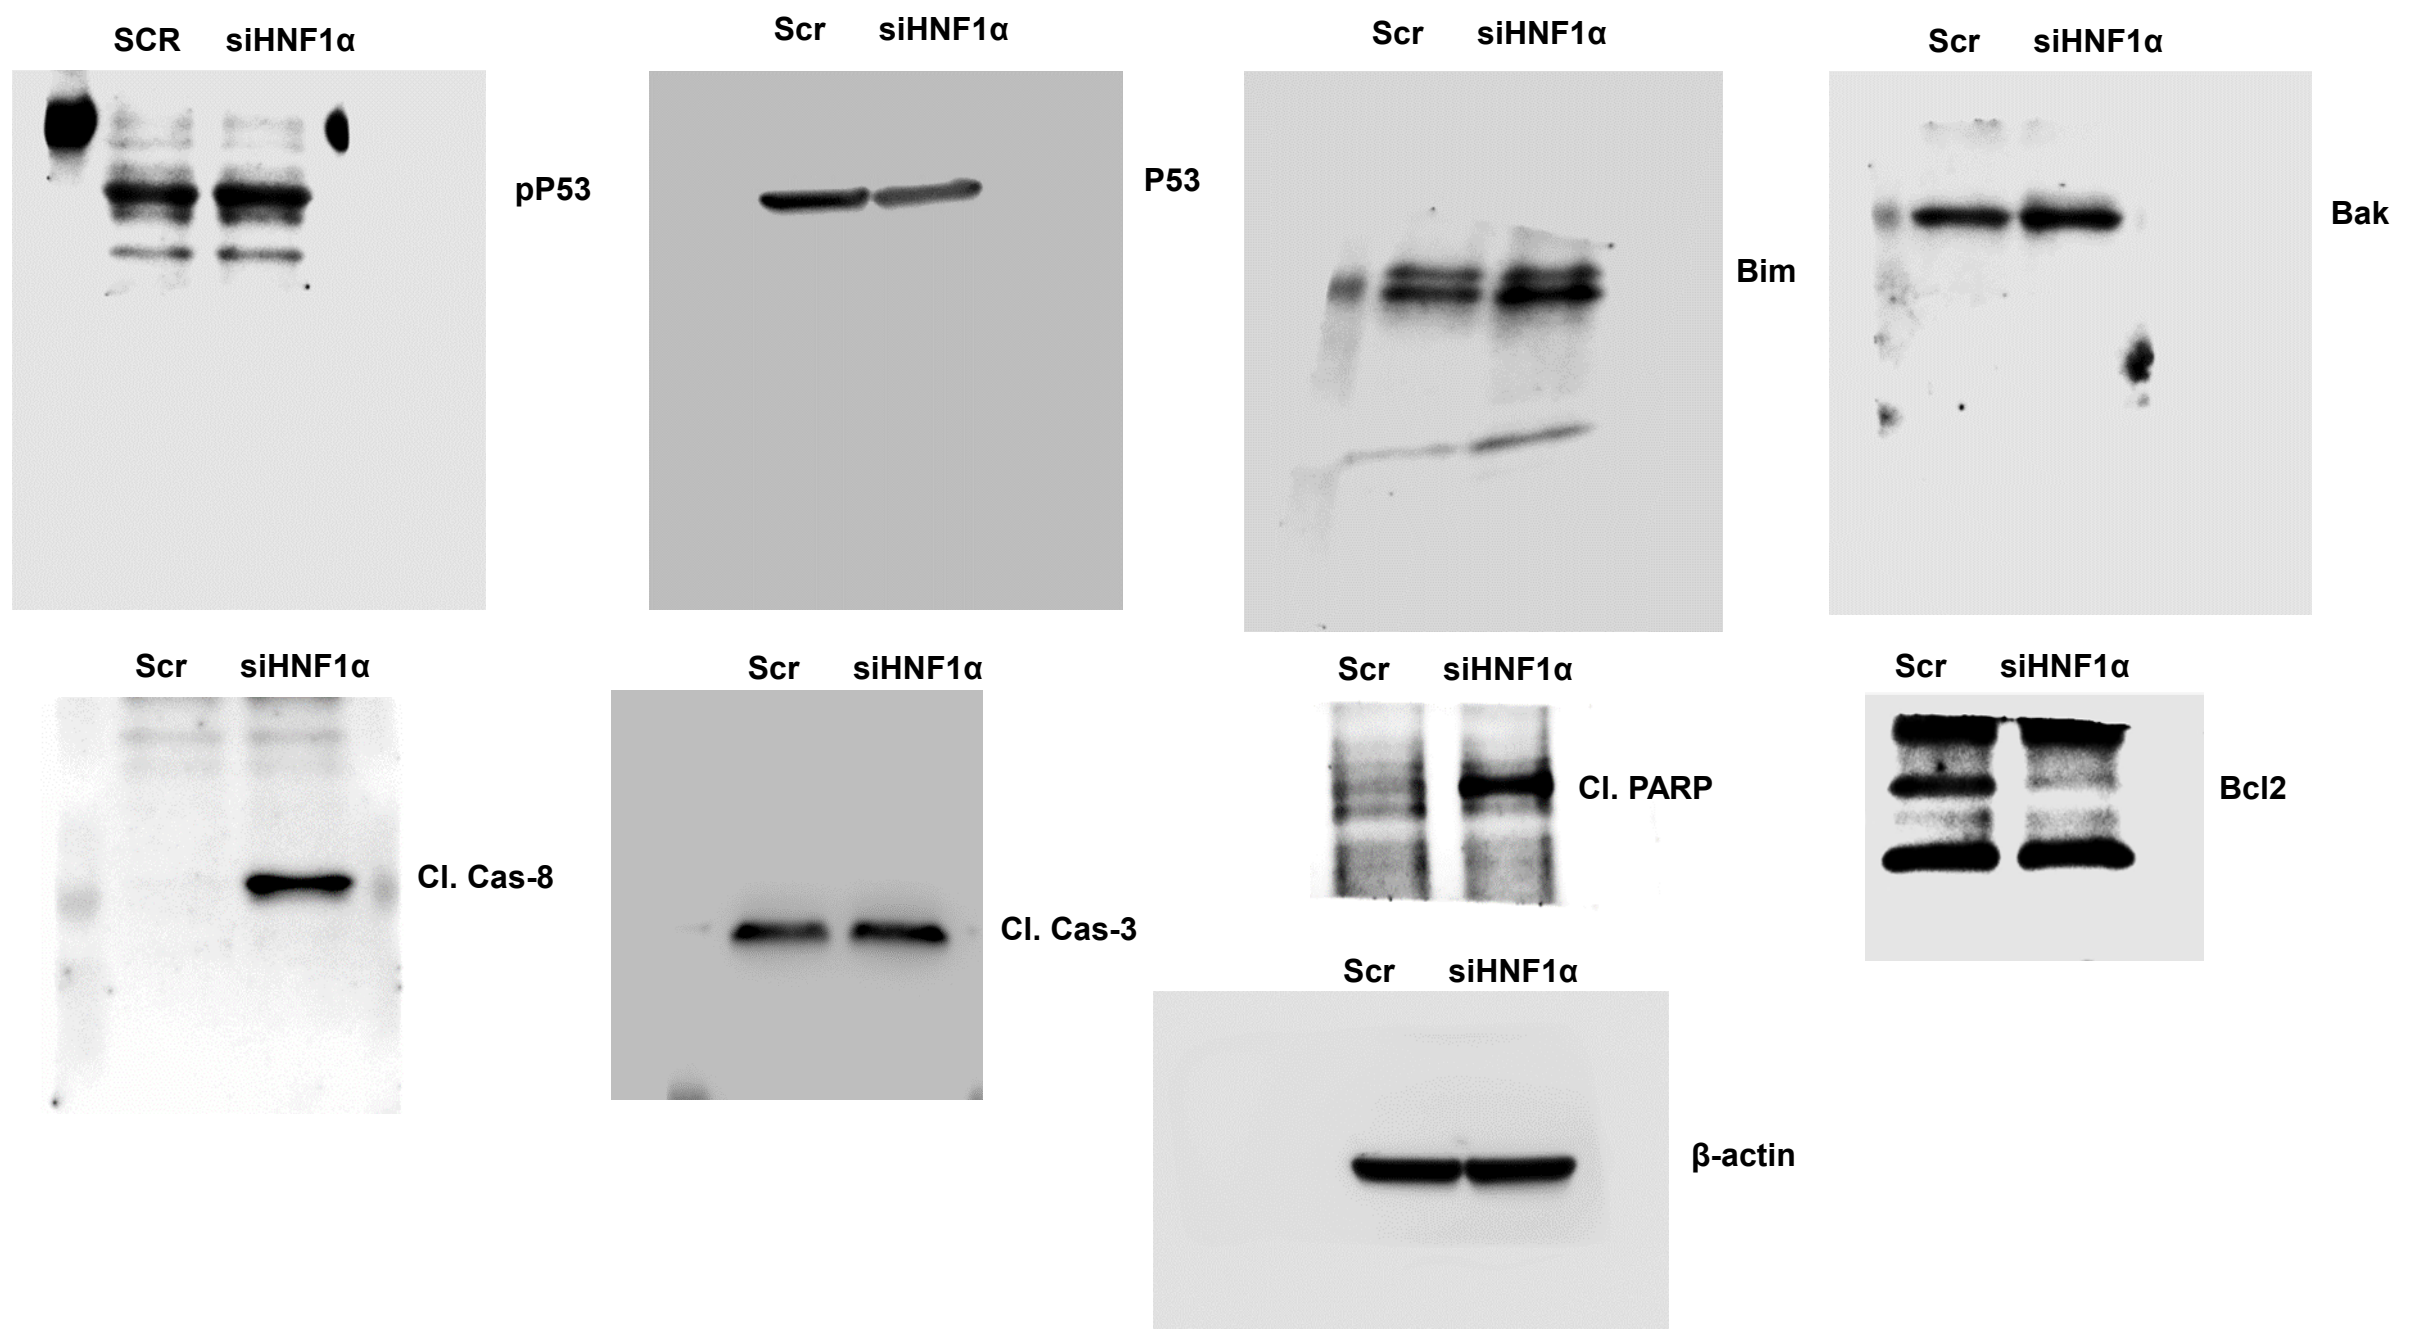

**Fig. 4G**

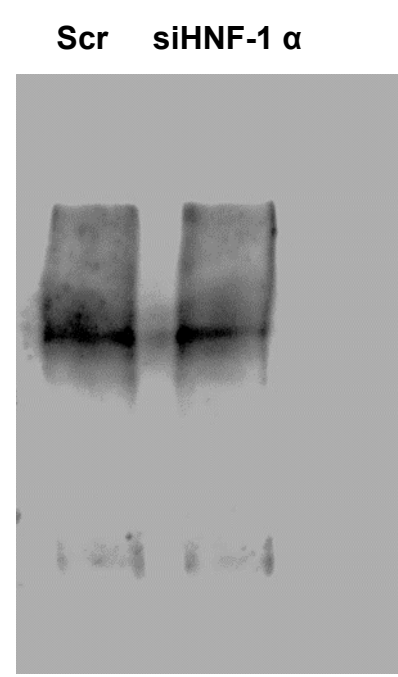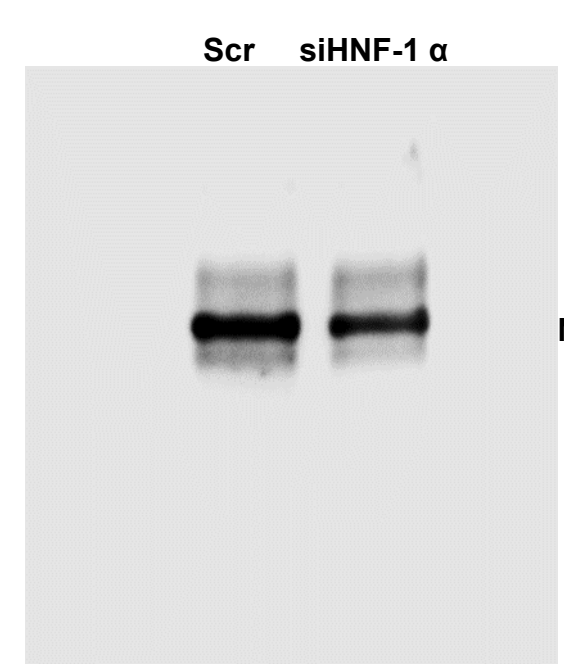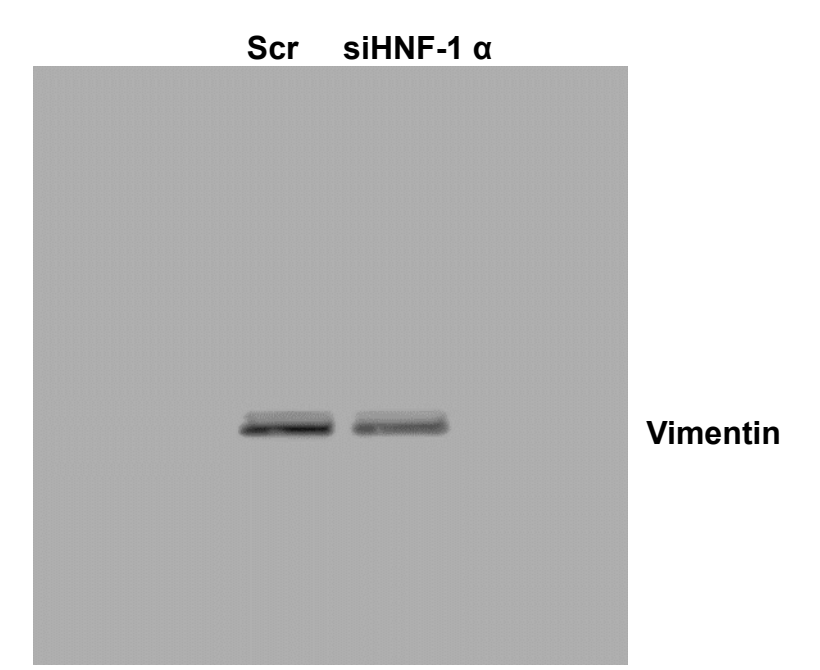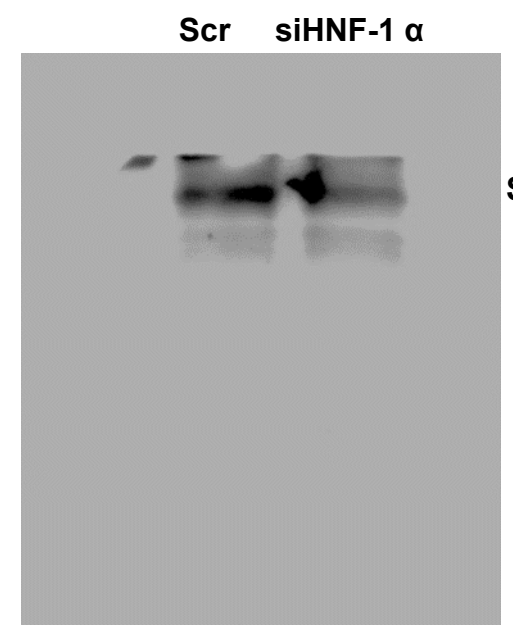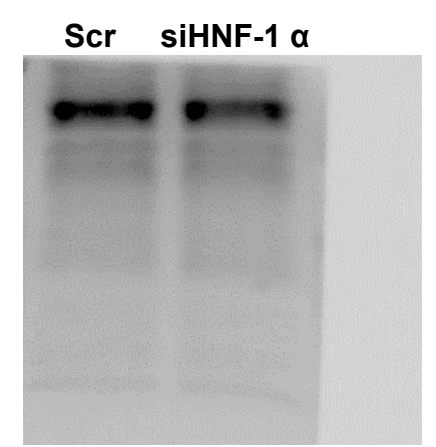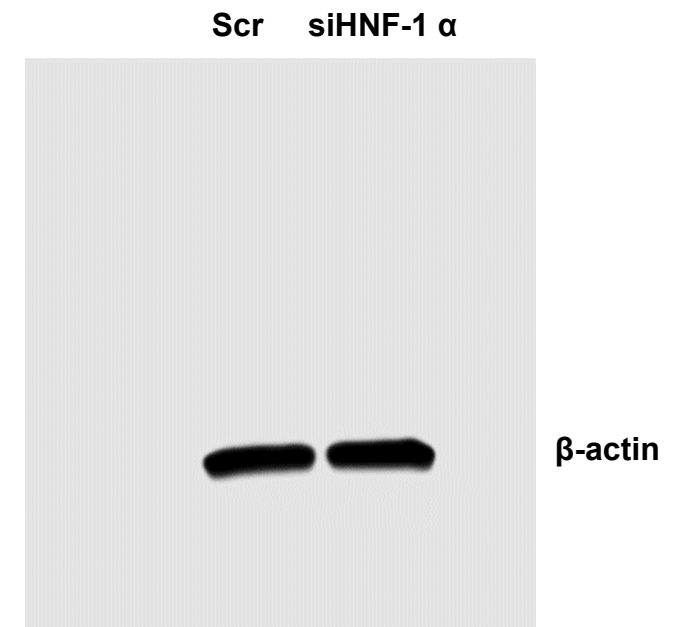

Fig. 5D

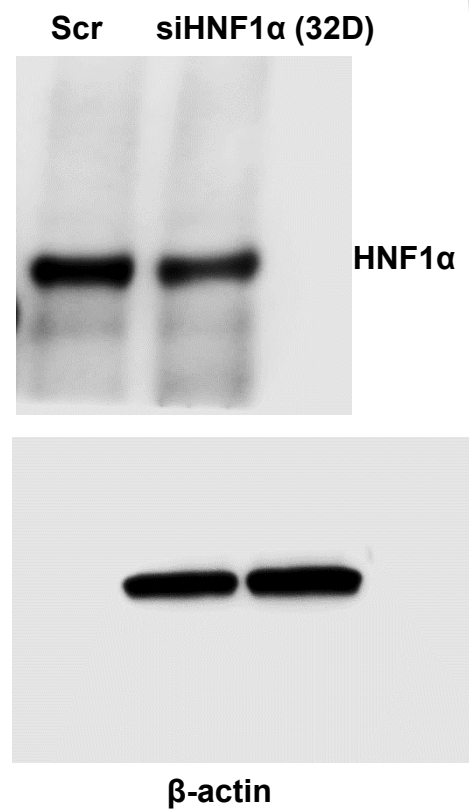

Fig. 5E Scr si-HNF1α

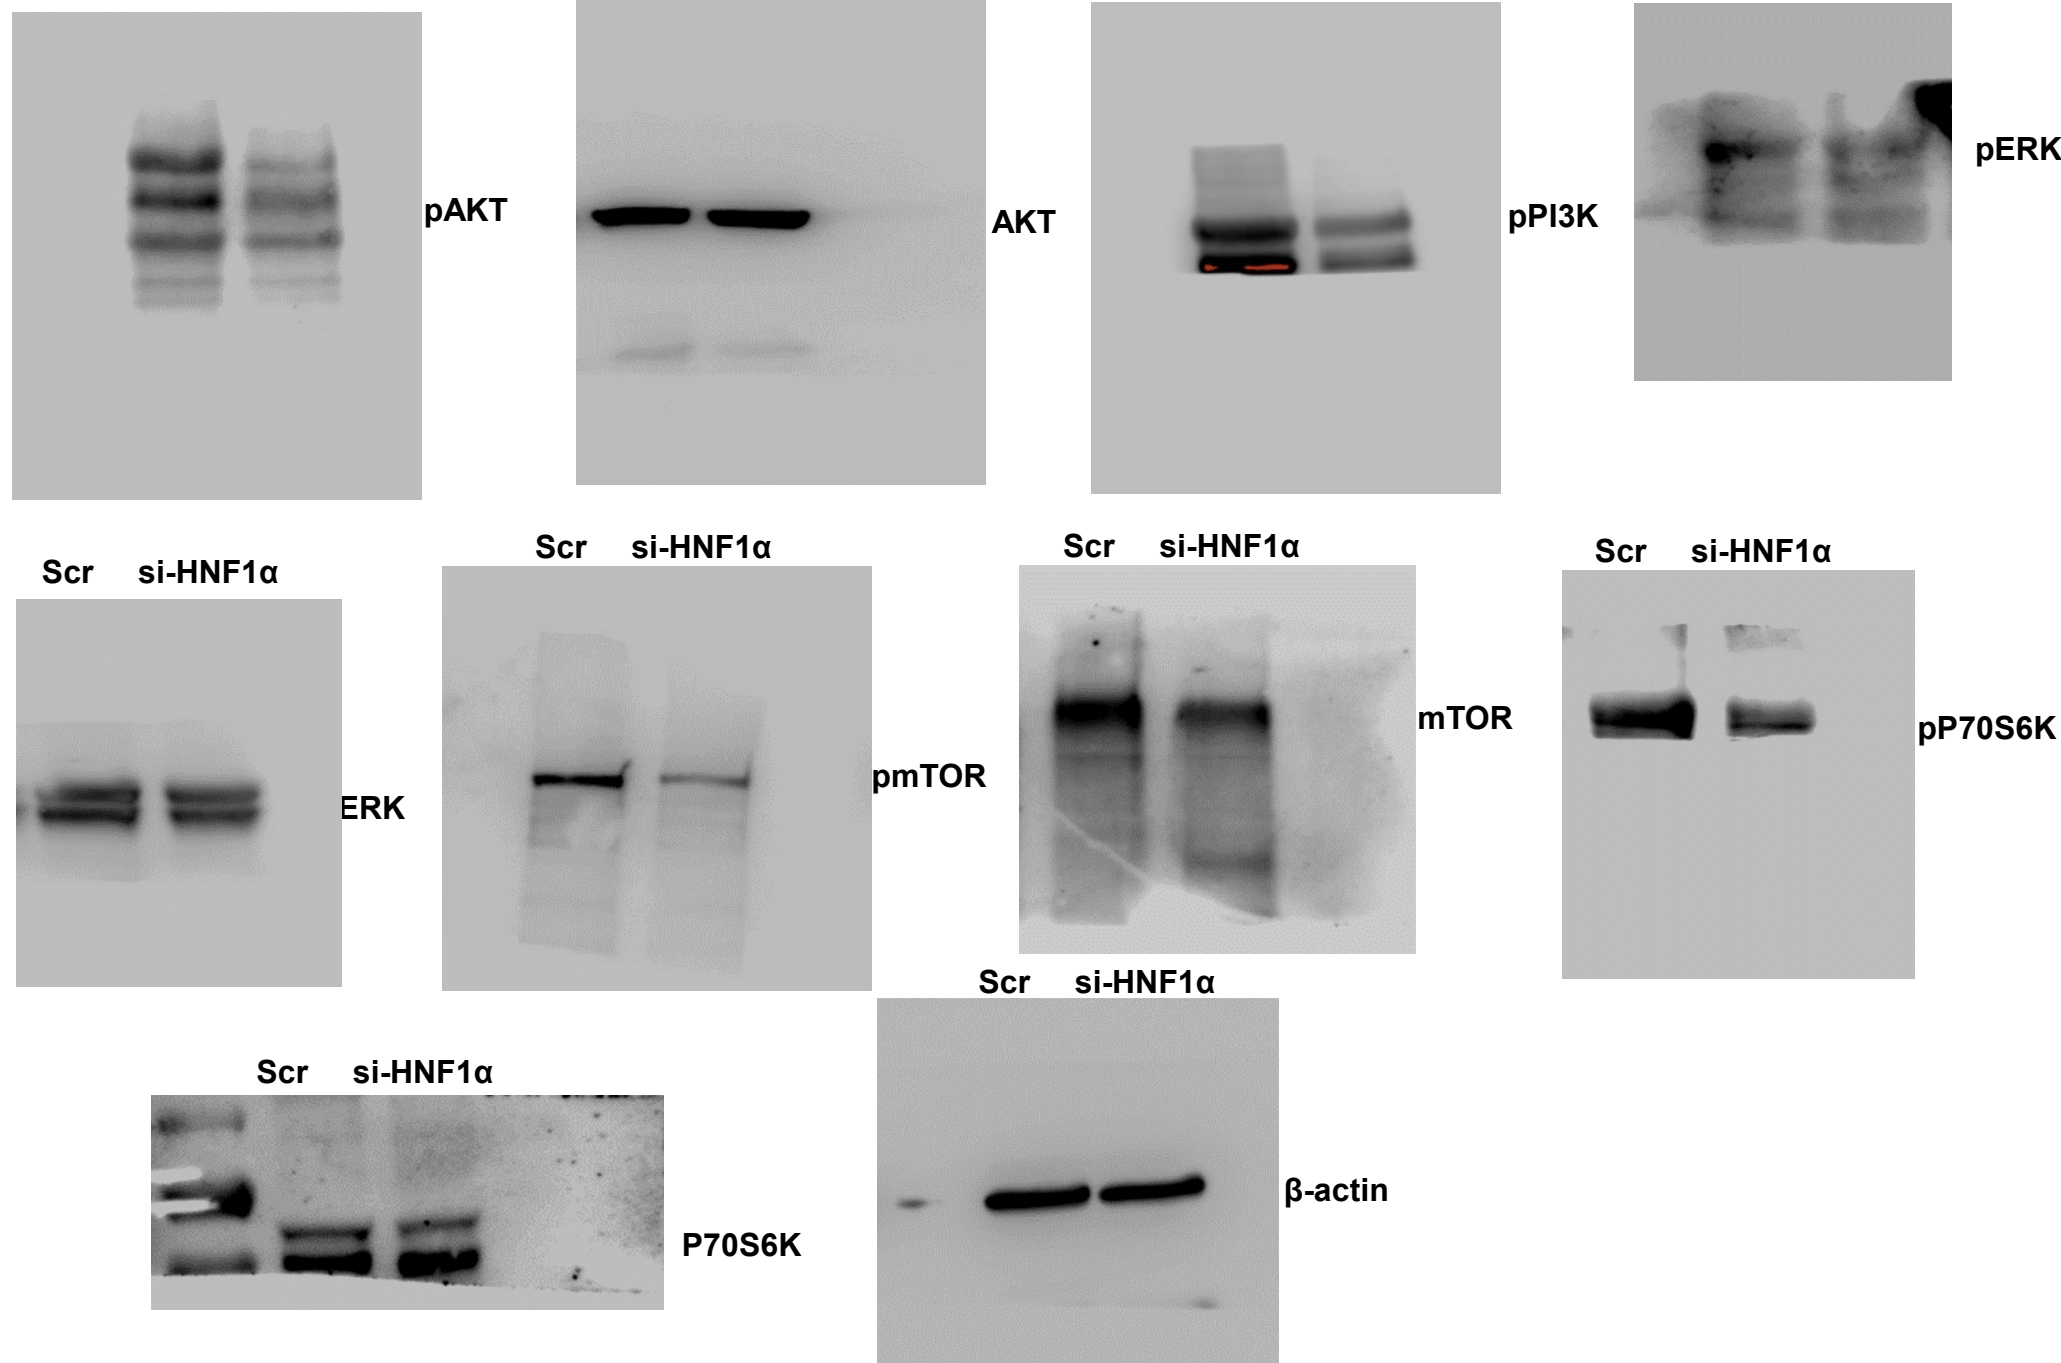

Fig. 5F

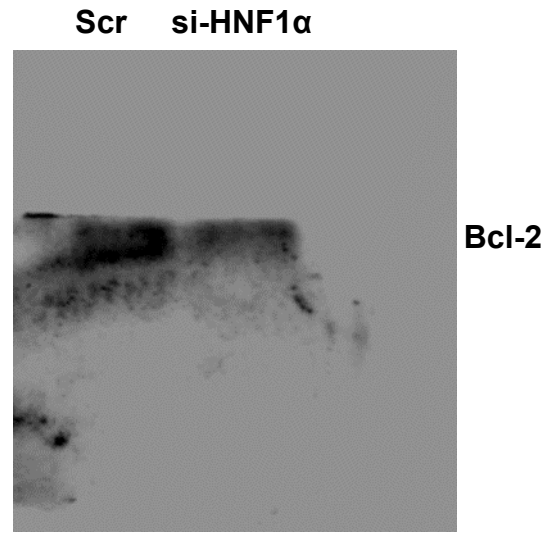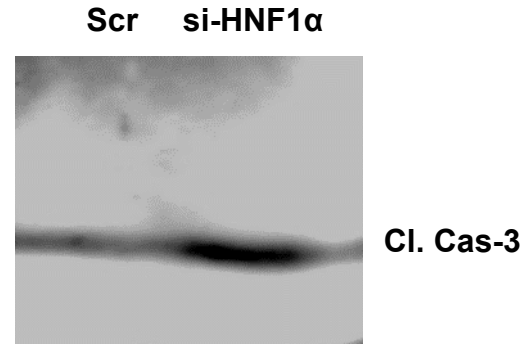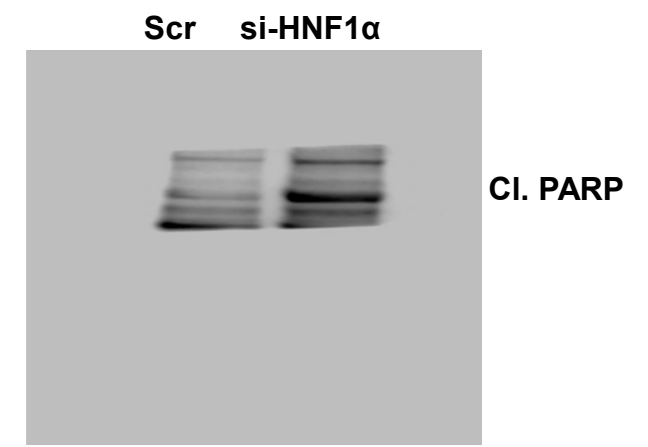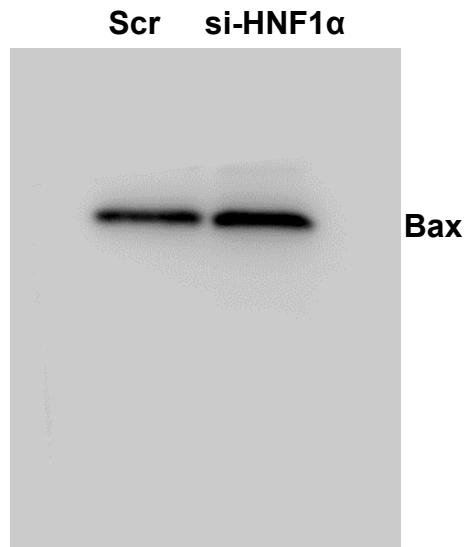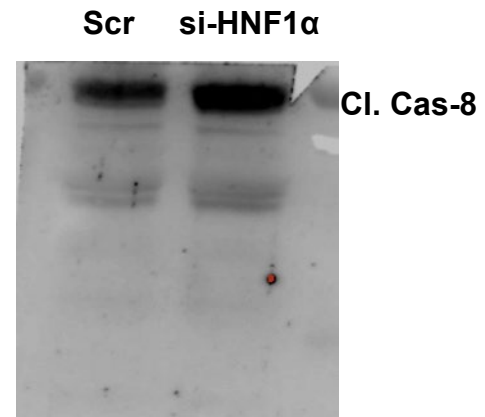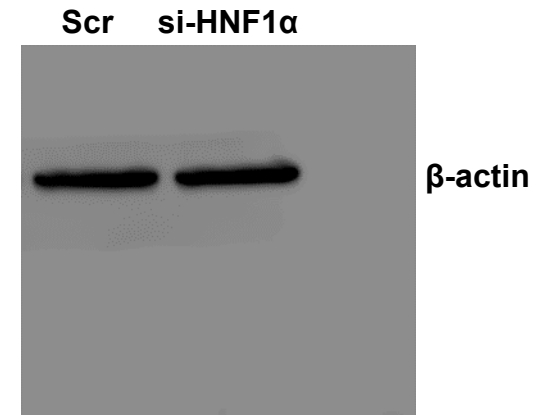



Fig. 5G

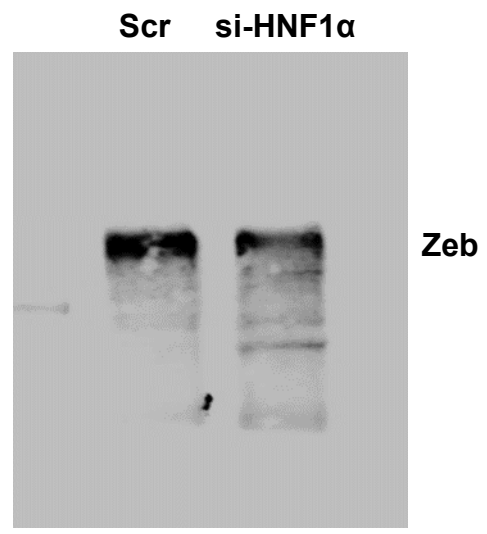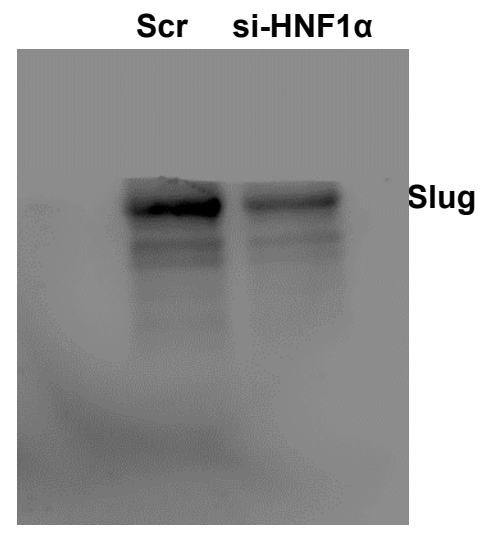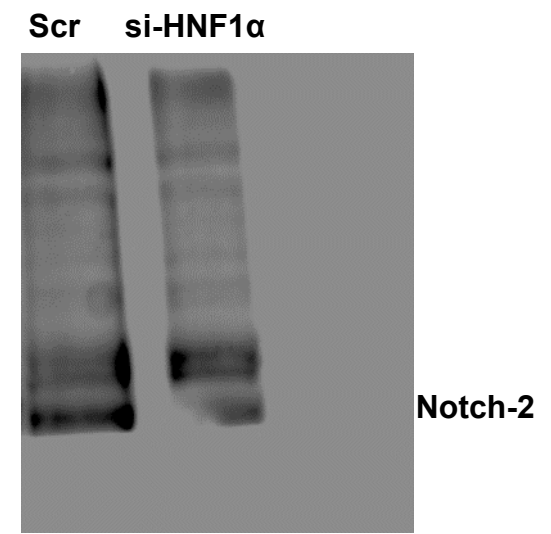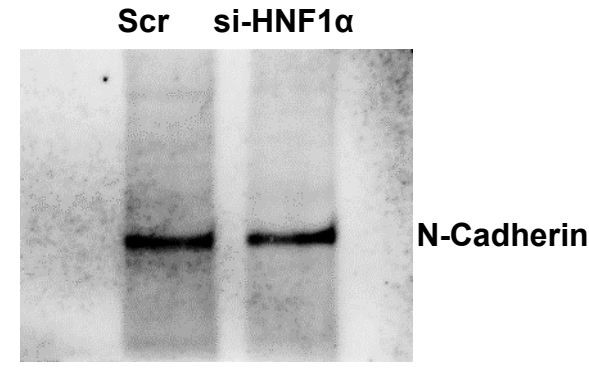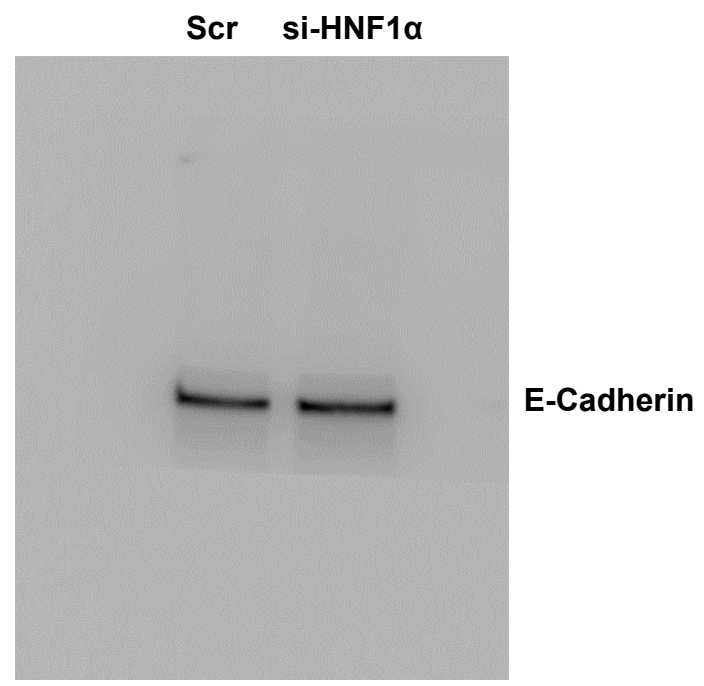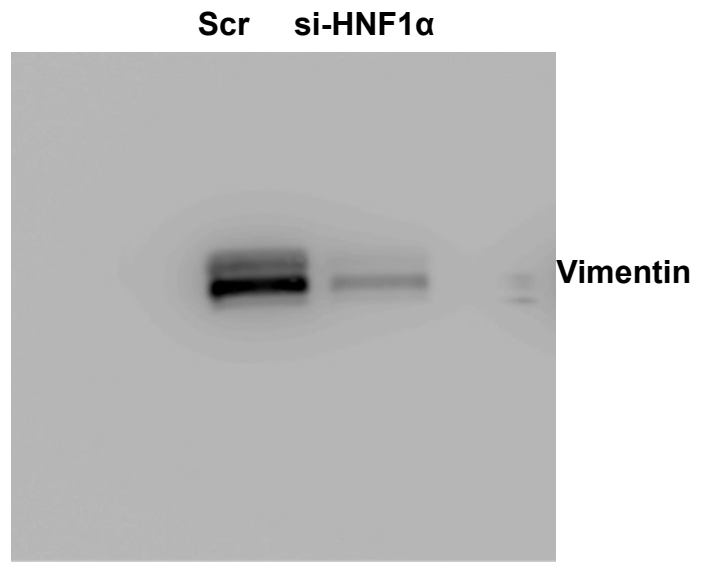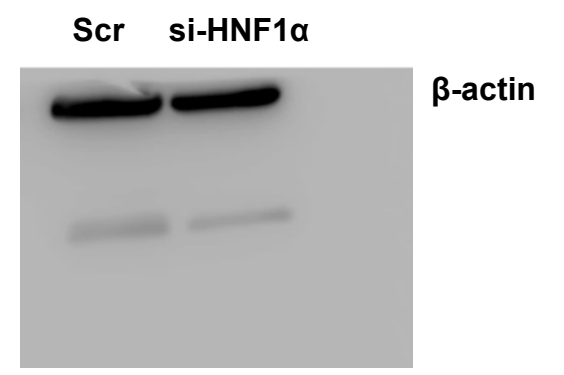

Supplementary Figure S1B

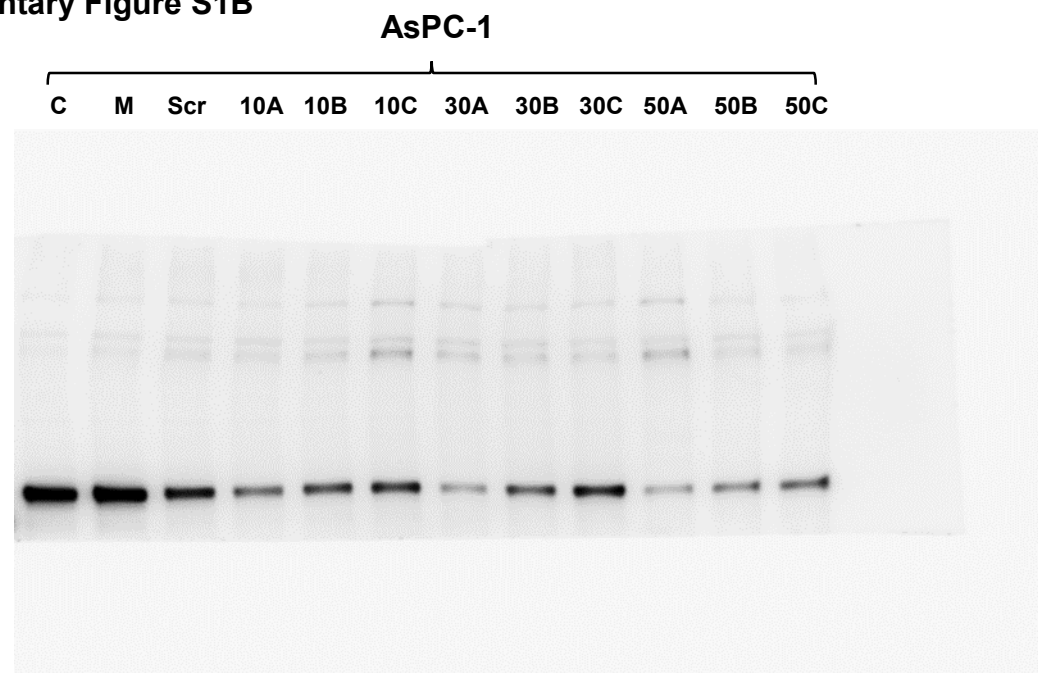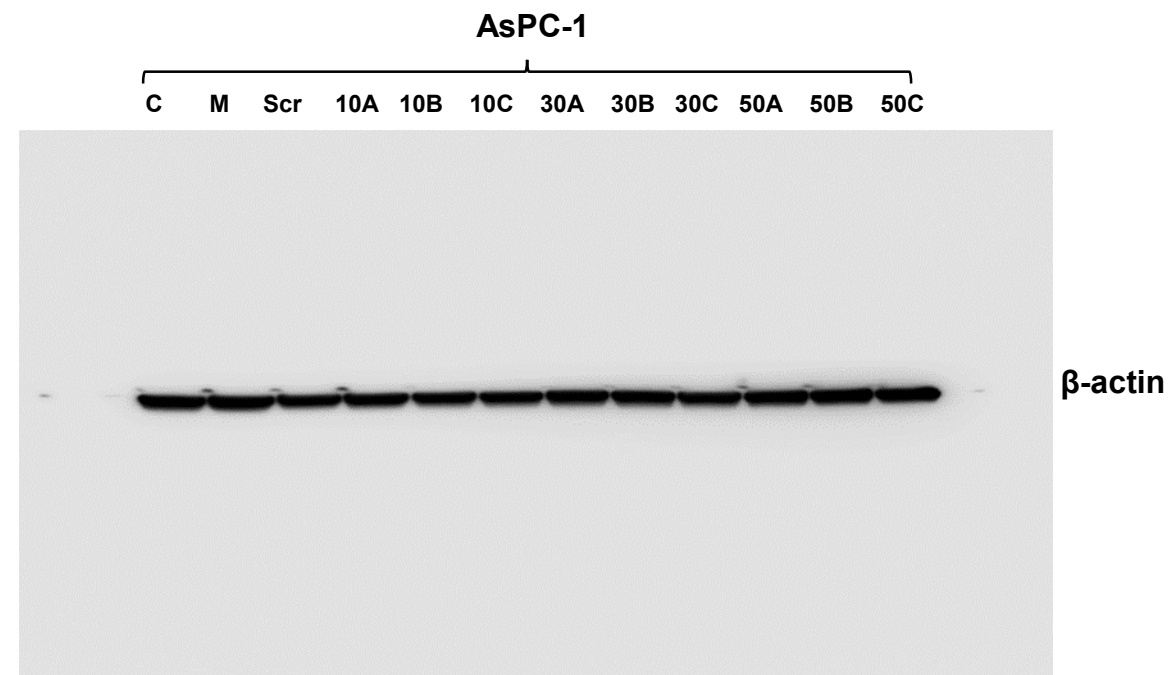

Supplementary Figure S2A

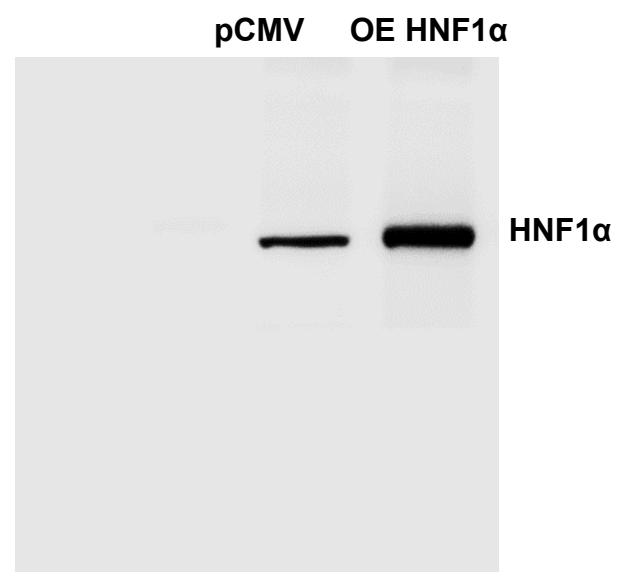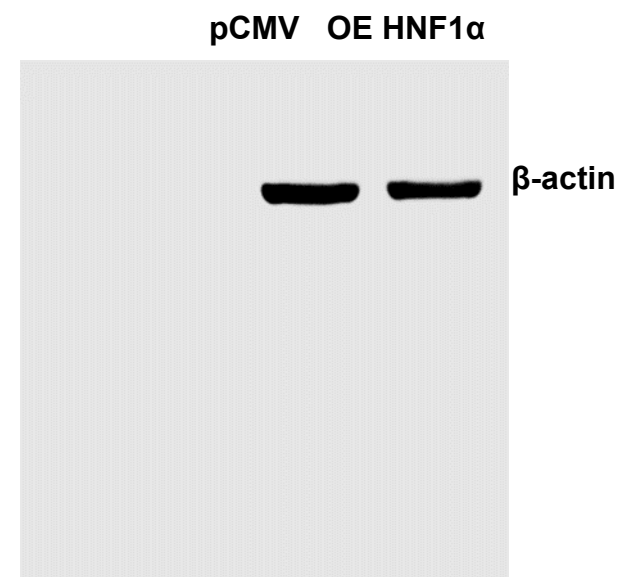

Supplementary Figure S3B

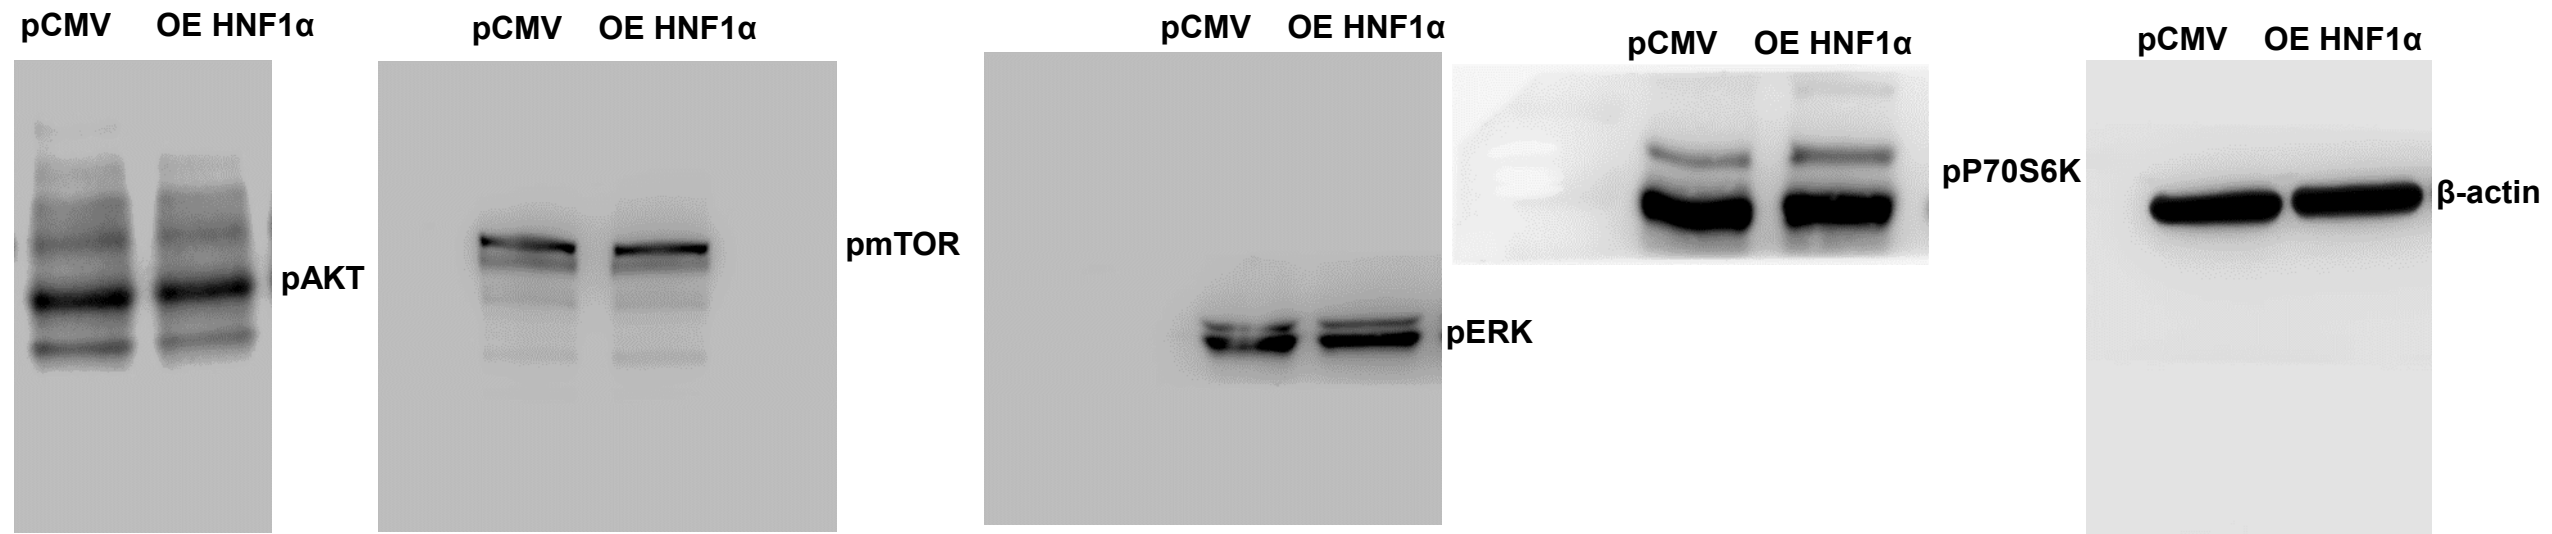

Supplementary Figure S4C

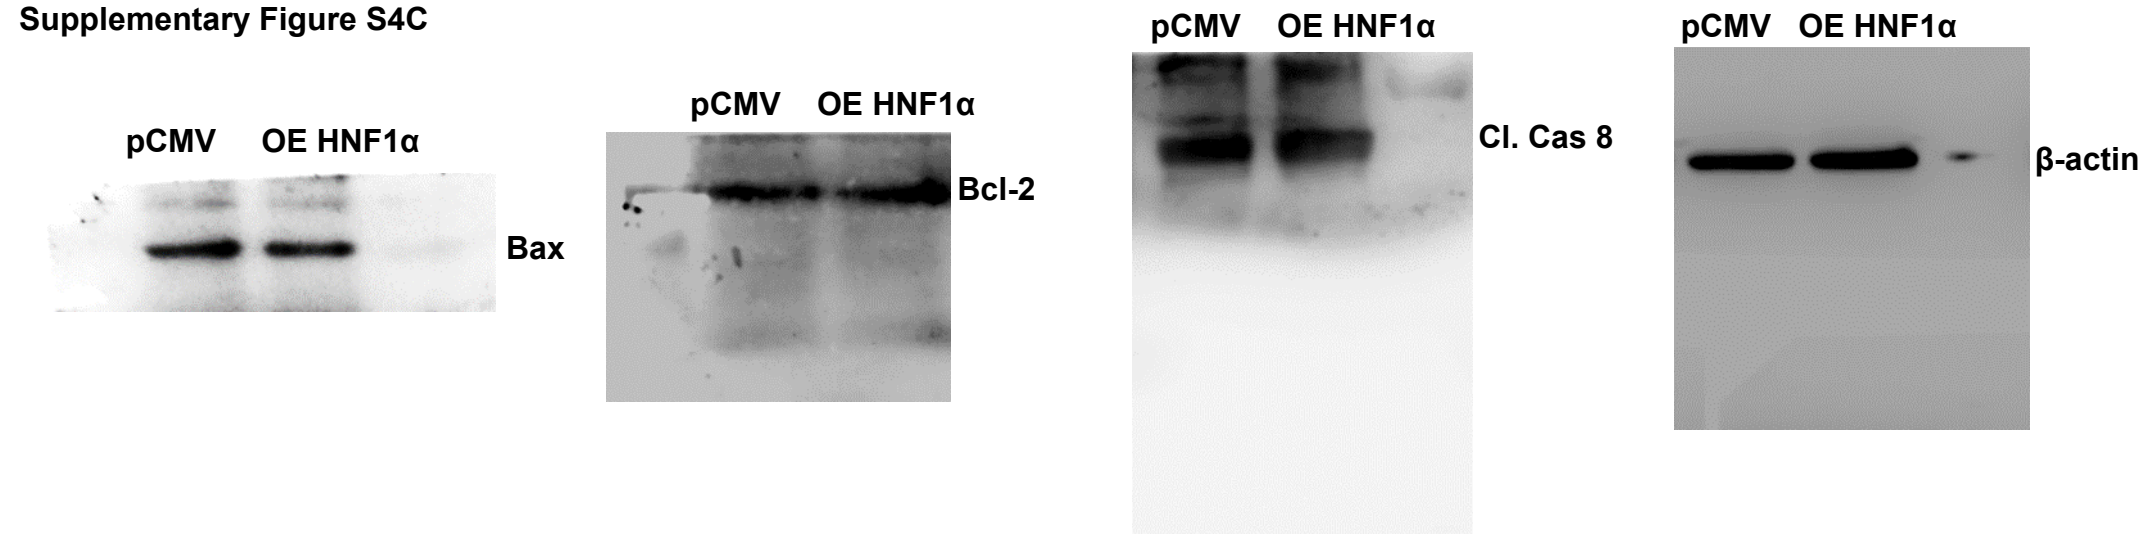

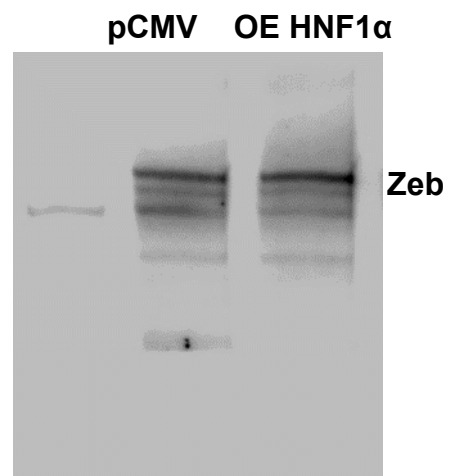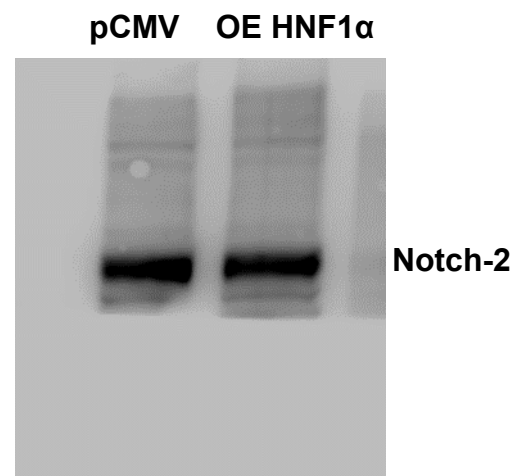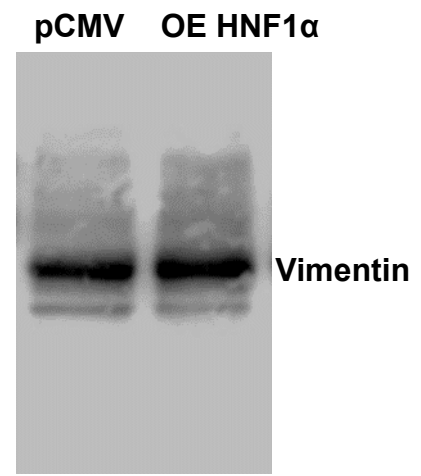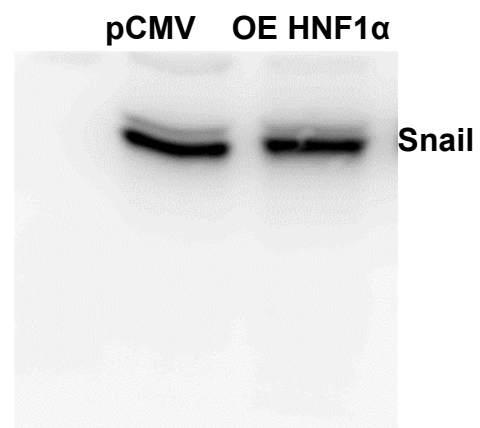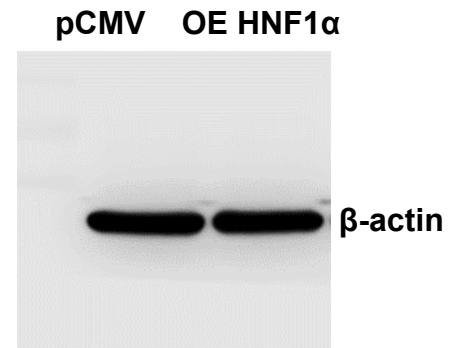

Supplement: 41598_2020_77287_MOESM1_ESM.pdf [file 41598_2020_77287_MOESM1_ESM.pdf]
